# Supplementary figures and images for: A structural approach to vibrational properties ranging from crystals to disordered systems
Source: Royal Society of Chemistry journal article supplement (doi:10.1039/d0sm01989e), 2020-12-14

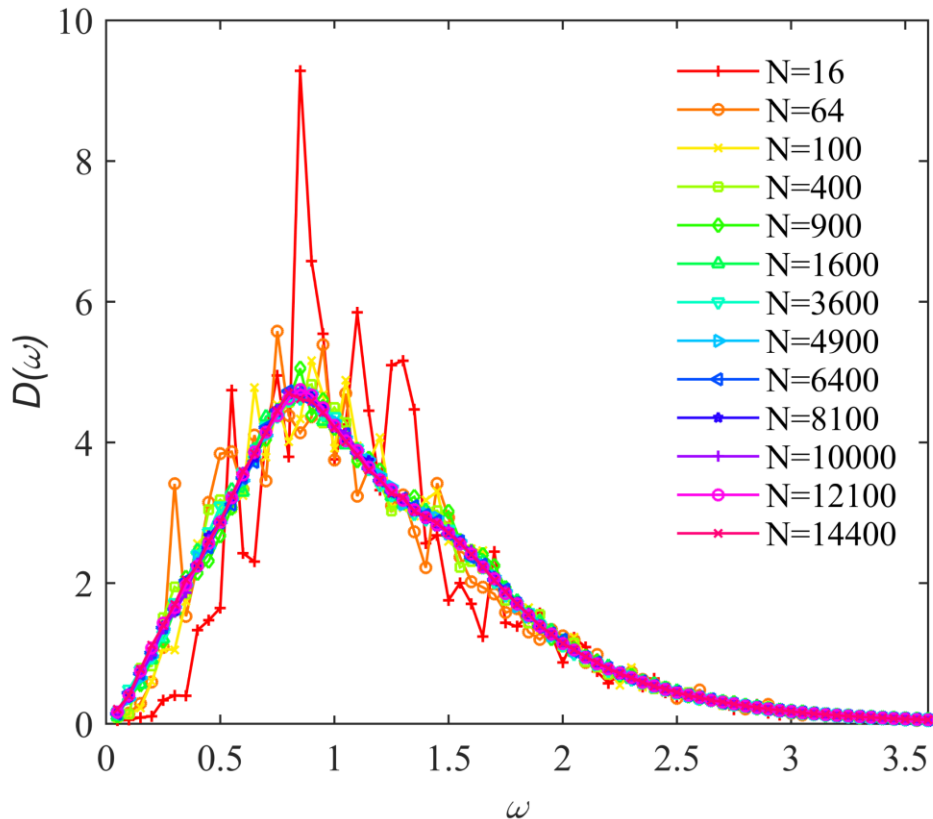

Supplement: d0sm01989e1.pdf [file d0sm01989e1.pdf]
